# Supplementary material
Source: PubMed Central journal article supplement (PMC6484855)
Supplement: NIHMS975942-supplement-Supp_TableS1.pdf [file NIHMS975942-supplement-Supp_TableS1.pdf]

**Supplementary Table 1. Hierarchical modeling of associations between MC1R variants and melanoma risk with three different tau<sup>2</sup> values**

| tau <sup>2</sup> = 0.025 |                                      | Val60Leu | Val92Met | Arg151Cys | Ile155Thr | Arg160Trp | Arg163Gln | Asp294His |
|--------------------------|--------------------------------------|----------|----------|-----------|-----------|-----------|-----------|-----------|
| OR                       | Equal weighted model                 | 1.70     | 1.76     | 2.09      | 1.86      | 1.83      | 1.82      | 1.98      |
| lower                    |                                      | 1.25     | 1.28     | 1.51      | 1.26      | 1.31      | 1.27      | 1.36      |
| upper                    |                                      | 2.32     | 2.41     | 2.89      | 2.75      | 2.56      | 2.61      | 2.89      |
| beta                     |                                      | 0.53     | 0.56     | 0.74      | 0.62      | 0.61      | 0.60      | 0.68      |
| se                       |                                      | 0.16     | 0.16     | 0.17      | 0.20      | 0.17      | 0.18      | 0.19      |
| OR                       | Model based on MC1R antibody binding | 1.70     | 1.72     | 2.13      | 1.95      | 1.87      | 1.80      | 1.90      |
| lower                    |                                      | 1.25     | 1.23     | 1.50      | 1.20      | 1.31      | 1.25      | 1.18      |
| upper                    |                                      | 2.32     | 2.42     | 3.03      | 3.17      | 2.68      | 2.60      | 3.05      |
| beta                     |                                      | 0.53     | 0.54     | 0.76      | 0.67      | 0.63      | 0.59      | 0.64      |
| se                       |                                      | 0.16     | 0.17     | 0.18      | 0.25      | 0.18      | 0.19      | 0.24      |
| OR                       | Model based on MSH ligand binding    | 1.70     | 1.74     | 2.10      | 1.93      | 1.85      | 1.81      | 1.94      |
| lower                    |                                      | 1.25     | 1.24     | 1.50      | 1.06      | 1.30      | 1.25      | 1.22      |
| upper                    |                                      | 2.32     | 2.44     | 2.95      | 3.51      | 2.63      | 2.62      | 3.10      |
| beta                     |                                      | 0.53     | 0.56     | 0.74      | 0.66      | 0.61      | 0.59      | 0.66      |
| se                       |                                      | 0.16     | 0.17     | 0.17      | 0.31      | 0.18      | 0.19      | 0.24      |
| OR                       | Model based on cAMP response to MSH  | 1.70     | 1.64     | 2.23      | 1.74      | 1.94      | 1.54      | 2.31      |
| lower                    |                                      | 1.25     | 1.17     | 1.58      | 1.16      | 1.37      | 0.97      | 1.47      |
| upper                    |                                      | 2.32     | 2.30     | 3.13      | 2.61      | 2.74      | 2.45      | 3.65      |
| beta                     |                                      | 0.53     | 0.50     | 0.80      | 0.55      | 0.66      | 0.43      | 0.84      |
| se                       |                                      | 0.16     | 0.17     | 0.17      | 0.21      | 0.18      | 0.24      | 0.23      |
| OR                       | Model based on kinetics - Ki-a-MSH   | 1.73     | 1.69     | 2.14      | 1.82      | 1.87      | 1.81      | 1.94      |
| lower                    |                                      | 1.25     | 1.16     | 1.51      | 1.22      | 1.32      | 1.26      | 1.31      |
| upper                    |                                      | 2.38     | 2.45     | 3.04      | 2.72      | 2.65      | 2.60      | 2.87      |
| beta                     |                                      | 0.55     | 0.52     | 0.76      | 0.60      | 0.63      | 0.59      | 0.66      |
| se                       |                                      | 0.16     | 0.19     | 0.18      | 0.21      | 0.18      | 0.19      | 0.20      |
| OR                       | Model based on kinetics - Ki-NDP     | 1.61     | 1.70     | 2.31      | 1.89      | 1.89      | 1.91      | 1.78      |
| lower                    |                                      | 1.15     | 1.23     | 1.57      | 1.28      | 1.35      | 1.31      | 1.14      |
| upper                    |                                      | 2.24     | 2.35     | 3.40      | 2.79      | 2.65      | 2.78      | 2.77      |
| beta                     |                                      | 0.47     | 0.53     | 0.84      | 0.63      | 0.64      | 0.65      | 0.58      |
| se                       |                                      | 0.17     | 0.17     | 0.20      | 0.20      | 0.17      | 0.19      | 0.23      |
| OR                       | Model based on hair color            | 1.60     | 1.61     | 2.21      | 1.86      | 2.06      | 1.71      | 2.38      |
| lower                    |                                      | 1.15     | 1.14     | 1.58      | 1.26      | 1.42      | 1.17      | 1.50      |
| upper                    |                                      | 2.21     | 2.27     | 3.09      | 2.75      | 2.98      | 2.48      | 3.79      |
| beta                     |                                      | 0.47     | 0.48     | 0.79      | 0.62      | 0.72      | 0.53      | 0.87      |
| se                       |                                      | 0.17     | 0.18     | 0.17      | 0.20      | 0.19      | 0.19      | 0.24      |
| OR                       | Model based on skin color            | 1.64     | 1.62     | 2.30      | 1.75      | 1.93      | 1.53      | 2.60      |
| lower                    |                                      | 1.20     | 1.16     | 1.62      | 1.17      | 1.37      | 1.00      | 1.56      |
| upper                    |                                      | 2.25     | 2.26     | 3.25      | 2.61      | 2.70      | 2.36      | 4.34      |
| beta                     |                                      | 0.50     | 0.48     | 0.83      | 0.56      | 0.66      | 0.43      | 0.96      |
| se                       |                                      | 0.16     | 0.17     | 0.18      | 0.20      | 0.17      | 0.22      | 0.26      |
| OR                       | Model based on tanning ability       | 1.62     | 1.63     | 2.30      | 1.94      | 1.86      | 1.52      | 2.76      |
| lower                    |                                      | 1.18     | 1.17     | 1.63      | 1.31      | 1.33      | 0.99      | 1.60      |
| upper                    |                                      | 2.22     | 2.27     | 3.25      | 2.87      | 2.60      | 2.33      | 4.74      |
| beta                     |                                      | 0.48     | 0.49     | 0.83      | 0.66      | 0.62      | 0.42      | 1.01      |
| se                       |                                      | 0.16     | 0.17     | 0.18      | 0.20      | 0.17      | 0.22      | 0.28      |

tau^2 = 0.10

|       |                                      | Val60Leu | Val92Met | Arg151Cys | Ile155Thr | Arg160Trp | Arg163Gln | Asp294His |
|-------|--------------------------------------|----------|----------|-----------|-----------|-----------|-----------|-----------|
| OR    | Equal weighted model                 | 1.60     | 1.69     | 2.30      | 1.88      | 1.82      | 1.78      | 2.22      |
| lower |                                      | 1.13     | 1.18     | 1.58      | 1.07      | 1.22      | 1.12      | 1.32      |
| upper |                                      | 2.28     | 2.44     | 3.36      | 3.31      | 2.70      | 2.84      | 3.72      |
| beta  |                                      | 0.47     | 0.53     | 0.83      | 0.63      | 0.60      | 0.58      | 0.80      |
| se    |                                      | 0.18     | 0.19     | 0.19      | 0.29      | 0.20      | 0.24      | 0.26      |
| OR    | Model based on MC1R antibody binding | 1.60     | 1.69     | 2.31      | 1.90      | 1.82      | 1.78      | 2.20      |
| lower |                                      | 1.13     | 1.17     | 1.57      | 1.01      | 1.22      | 1.12      | 1.24      |
| upper |                                      | 2.28     | 2.45     | 3.40      | 3.58      | 2.73      | 2.85      | 3.92      |
| beta  |                                      | 0.47     | 0.53     | 0.84      | 0.64      | 0.60      | 0.58      | 0.79      |
| se    |                                      | 0.18     | 0.19     | 0.20      | 0.32      | 0.21      | 0.24      | 0.29      |
| OR    | Model based on MSH ligand binding    | 1.60     | 1.70     | 2.30      | 1.87      | 1.81      | 1.79      | 2.22      |
| lower |                                      | 1.13     | 1.17     | 1.57      | 0.92      | 1.21      | 1.12      | 1.26      |
| upper |                                      | 2.28     | 2.45     | 3.37      | 3.80      | 2.71      | 2.85      | 3.93      |
| beta  |                                      | 0.47     | 0.53     | 0.83      | 0.63      | 0.60      | 0.58      | 0.80      |
| se    |                                      | 0.18     | 0.19     | 0.20      | 0.36      | 0.20      | 0.24      | 0.29      |
| OR    | Model based on cAMP response to MSH  | 1.60     | 1.65     | 2.37      | 1.79      | 1.86      | 1.62      | 2.46      |
| lower |                                      | 1.13     | 1.14     | 1.61      | 1.01      | 1.25      | 0.96      | 1.40      |
| upper |                                      | 2.28     | 2.39     | 3.47      | 3.19      | 2.78      | 2.73      | 4.32      |
| beta  |                                      | 0.47     | 0.50     | 0.86      | 0.58      | 0.62      | 0.48      | 0.90      |
| se    |                                      | 0.18     | 0.19     | 0.20      | 0.29      | 0.20      | 0.27      | 0.29      |
| OR    | Model based on kinetics - Ki-a-MSH   | 1.61     | 1.67     | 2.33      | 1.86      | 1.83      | 1.78      | 2.19      |
| lower |                                      | 1.13     | 1.14     | 1.58      | 1.05      | 1.23      | 1.12      | 1.30      |
| upper |                                      | 2.30     | 2.45     | 3.43      | 3.30      | 2.74      | 2.84      | 3.71      |
| beta  |                                      | 0.48     | 0.51     | 0.84      | 0.62      | 0.61      | 0.58      | 0.79      |
| se    |                                      | 0.18     | 0.20     | 0.20      | 0.29      | 0.20      | 0.24      | 0.27      |
| OR    | Model based on kinetics - Ki-NDP     | 1.58     | 1.68     | 2.38      | 1.90      | 1.84      | 1.82      | 2.10      |
| lower |                                      | 1.10     | 1.16     | 1.59      | 1.08      | 1.23      | 1.14      | 1.20      |
| upper |                                      | 2.26     | 2.42     | 3.56      | 3.33      | 2.73      | 2.92      | 3.70      |
| beta  |                                      | 0.45     | 0.52     | 0.87      | 0.64      | 0.61      | 0.60      | 0.74      |
| se    |                                      | 0.18     | 0.19     | 0.21      | 0.29      | 0.20      | 0.24      | 0.29      |
| OR    | Model based on hair color            | 1.55     | 1.63     | 2.35      | 1.87      | 1.92      | 1.71      | 2.50      |
| lower |                                      | 1.09     | 1.12     | 1.61      | 1.06      | 1.27      | 1.06      | 1.42      |
| upper |                                      | 2.23     | 2.37     | 3.44      | 3.29      | 2.88      | 2.75      | 4.41      |
| beta  |                                      | 0.44     | 0.49     | 0.86      | 0.63      | 0.65      | 0.54      | 0.92      |
| se    |                                      | 0.18     | 0.19     | 0.19      | 0.29      | 0.21      | 0.24      | 0.29      |
| OR    | Model based on skin color            | 1.58     | 1.63     | 2.39      | 1.79      | 1.86      | 1.62      | 2.63      |
| lower |                                      | 1.11     | 1.13     | 1.63      | 1.01      | 1.25      | 0.98      | 1.45      |
| upper |                                      | 2.25     | 2.37     | 3.51      | 3.18      | 2.76      | 2.68      | 4.77      |
| beta  |                                      | 0.45     | 0.49     | 0.87      | 0.58      | 0.62      | 0.48      | 0.97      |
| se    |                                      | 0.18     | 0.19     | 0.20      | 0.29      | 0.20      | 0.26      | 0.30      |
| OR    | Model based on tanning ability       | 1.57     | 1.64     | 2.39      | 1.92      | 1.82      | 1.61      | 2.71      |
| lower |                                      | 1.10     | 1.13     | 1.63      | 1.09      | 1.23      | 0.97      | 1.47      |
| upper |                                      | 2.23     | 2.37     | 3.50      | 3.38      | 2.71      | 2.66      | 4.98      |
| beta  |                                      | 0.45     | 0.49     | 0.87      | 0.65      | 0.60      | 0.47      | 1.00      |
| se    |                                      | 0.18     | 0.19     | 0.20      | 0.29      | 0.20      | 0.26      | 0.31      |

tau^2 = 0.40

|       |                                      | Val60Leu | Val92Met | Arg151Cys | Ile155Thr | Arg160Trp | Arg163Gln | Asp294His |
|-------|--------------------------------------|----------|----------|-----------|-----------|-----------|-----------|-----------|
| OR    | Equal weighted model                 | 1.55     | 1.66     | 2.42      | 1.88      | 1.80      | 1.74      | 2.48      |
| lower |                                      | 1.07     | 1.12     | 1.61      | 0.91      | 1.17      | 1.01      | 1.33      |
| upper |                                      | 2.25     | 2.45     | 3.63      | 3.92      | 2.77      | 2.98      | 4.63      |
| beta  |                                      | 0.44     | 0.50     | 0.88      | 0.63      | 0.59      | 0.55      | 0.91      |
| se    |                                      | 0.19     | 0.20     | 0.21      | 0.37      | 0.22      | 0.27      | 0.32      |
| OR    | Model based on MC1R antibody binding | 1.55     | 1.66     | 2.42      | 1.87      | 1.80      | 1.74      | 2.49      |
| lower |                                      | 1.07     | 1.12     | 1.61      | 0.87      | 1.17      | 1.01      | 1.30      |
| upper |                                      | 2.25     | 2.45     | 3.63      | 4.04      | 2.77      | 2.98      | 4.75      |
| beta  |                                      | 0.44     | 0.51     | 0.88      | 0.63      | 0.59      | 0.55      | 0.91      |
| se    |                                      | 0.19     | 0.20     | 0.21      | 0.39      | 0.22      | 0.28      | 0.33      |
| OR    | Model based on MSH ligand binding    | 1.55     | 1.66     | 2.42      | 1.86      | 1.80      | 1.74      | 2.49      |
| lower |                                      | 1.07     | 1.12     | 1.61      | 0.84      | 1.17      | 1.02      | 1.31      |
| upper |                                      | 2.25     | 2.45     | 3.63      | 4.14      | 2.77      | 2.98      | 4.75      |
| beta  |                                      | 0.44     | 0.51     | 0.88      | 0.62      | 0.59      | 0.55      | 0.91      |
| se    |                                      | 0.19     | 0.20     | 0.21      | 0.41      | 0.22      | 0.28      | 0.33      |
| OR    | Model based on cAMP response to MSH  | 1.55     | 1.64     | 2.44      | 1.84      | 1.82      | 1.68      | 2.59      |
| lower |                                      | 1.06     | 1.11     | 1.63      | 0.88      | 1.18      | 0.96      | 1.36      |
| upper |                                      | 2.25     | 2.43     | 3.66      | 3.86      | 2.79      | 2.93      | 4.93      |
| beta  |                                      | 0.44     | 0.50     | 0.89      | 0.61      | 0.60      | 0.52      | 0.95      |
| se    |                                      | 0.19     | 0.20     | 0.21      | 0.38      | 0.22      | 0.29      | 0.33      |
| OR    | Model based on kinetics - Ki-a-MSH   | 1.55     | 1.65     | 2.43      | 1.87      | 1.80      | 1.74      | 2.47      |
| lower |                                      | 1.07     | 1.11     | 1.61      | 0.90      | 1.17      | 1.01      | 1.32      |
| upper |                                      | 2.26     | 2.45     | 3.65      | 3.92      | 2.78      | 2.98      | 4.63      |
| beta  |                                      | 0.44     | 0.50     | 0.89      | 0.63      | 0.59      | 0.55      | 0.90      |
| se    |                                      | 0.19     | 0.20     | 0.21      | 0.38      | 0.22      | 0.27      | 0.32      |
| OR    | Model based on kinetics - Ki-NDP     | 1.54     | 1.65     | 2.44      | 1.89      | 1.80      | 1.75      | 2.45      |
| lower |                                      | 1.06     | 1.12     | 1.61      | 0.91      | 1.17      | 1.02      | 1.28      |
| upper |                                      | 2.25     | 2.44     | 3.68      | 3.93      | 2.77      | 3.00      | 4.66      |
| beta  |                                      | 0.43     | 0.50     | 0.89      | 0.64      | 0.59      | 0.56      | 0.89      |
| se    |                                      | 0.19     | 0.20     | 0.21      | 0.37      | 0.22      | 0.28      | 0.33      |
| OR    | Model based on hair color            | 1.53     | 1.63     | 2.43      | 1.87      | 1.83      | 1.71      | 2.61      |
| lower |                                      | 1.05     | 1.10     | 1.62      | 0.90      | 1.19      | 0.99      | 1.37      |
| upper |                                      | 2.23     | 2.42     | 3.65      | 3.90      | 2.82      | 2.94      | 4.96      |
| beta  |                                      | 0.43     | 0.49     | 0.89      | 0.63      | 0.61      | 0.53      | 0.96      |
| se    |                                      | 0.19     | 0.20     | 0.21      | 0.37      | 0.22      | 0.28      | 0.33      |
| OR    | Model based on skin color            | 1.54     | 1.64     | 2.45      | 1.84      | 1.81      | 1.67      | 2.66      |
| lower |                                      | 1.06     | 1.11     | 1.63      | 0.88      | 1.18      | 0.96      | 1.38      |
| upper |                                      | 2.24     | 2.42     | 3.67      | 3.85      | 2.78      | 2.91      | 5.11      |
| beta  |                                      | 0.43     | 0.49     | 0.89      | 0.61      | 0.59      | 0.52      | 0.98      |
| se    |                                      | 0.19     | 0.20     | 0.21      | 0.38      | 0.22      | 0.28      | 0.33      |
| OR    | Model based on tanning ability       | 1.54     | 1.64     | 2.44      | 1.90      | 1.80      | 1.67      | 2.68      |
| lower |                                      | 1.06     | 1.11     | 1.63      | 0.91      | 1.17      | 0.96      | 1.39      |
| upper |                                      | 2.24     | 2.43     | 3.67      | 3.94      | 2.77      | 2.91      | 5.18      |
| beta  |                                      | 0.43     | 0.49     | 0.89      | 0.64      | 0.59      | 0.51      | 0.99      |
| se    |                                      | 0.19     | 0.20     | 0.21      | 0.37      | 0.22      | 0.28      | 0.34      |
